# Supplementary material for: Assessment of Disruptive Life Events for Individuals Diagnosed With Schizophrenia or Bipolar I Disorder Using Data From a Consumer Credit Reporting Agency
Source: PubMed Central journal article supplement — JAMA Psychiatry. 2023 May 10;80(7):710–7. doi: 10.1001/jamapsychiatry.2023.1179 (PMC10173103; doi:10.1001/jamapsychiatry.2023.1179), 2023-05-10
Supplement: jamapsychiatry-e231179-s002.pdf [file jamapsychiatry-e231179-s002.pdf]

## **Data Sharing Statement**

Nau. Assessment of Disruptive Life Events for Individuals Diagnosed With Schizophrenia or Bipolar I Disorder Using Data From a Consumer Credit Reporting Agency. *JAMA Psychiatry*. Published May 10, 2023. doi:10.1001/jamapsychiatry.2023.1179

### **Data**

**Data available:** No
